# Supplementary material for: Identification of novel tau positron emission tomography tracers for chronic traumatic encephalopathy by comprehensive in silico screening and molecular dynamics simulation
Source: Royal Society of Chemistry journal article supplement (doi:10.1039/d4cp03207a), 2024-12-10
Supplement: d4cp03207a1.pdf [file d4cp03207a1.pdf]

## SUPPLEMENTARY INFORMATION

### Identification of novel tau positron emission tomography tracers for chronic traumatic encephalopathy by comprehensive in silico screening and molecular dynamics simulation

Bote Qi<sup>a</sup>, Lulu Guan<sup>a</sup>, Jingwang Tan<sup>a</sup>, Gengchen Li<sup>b</sup>, Yunxiang Sun<sup>c</sup>, Qingwen Zhang<sup>d</sup>, and Yu Zou<sup>a\*</sup>

<sup>a</sup>Department of Sport and Exercise Science, College of Education, Zhejiang University, Hangzhou 310058 Zhejiang, China

<sup>b</sup>School of Life Science and Technology, ShanghaiTech University, Shanghai 201210, China

<sup>c</sup>Department of Physics, Ningbo University, Ningbo 315211 Zhejiang, China

<sup>d</sup>College of Physical Education and Training, Shanghai University of Sport, Shanghai 200438, China

\* Corresponding Author: Yu Zou – Email: zouyuzy@zju.edu.cn

**Table S1** Parameter ranges for the physicochemical properties of CNS PET MPO

| Parameter              | Type of Transformation<br>Function | Weight | CNS PET MPO                |                            |
|------------------------|------------------------------------|--------|----------------------------|----------------------------|
|                        |                                    |        | Desirable range            | Undesirable range          |
| MW (g/mol)             | Monotonic decreasing               | 1      | MW ≤ 305.3                 | MW > 350.5                 |
| ClogP                  | Monotonic decreasing               | 1      | Clog P ≤ 2.8               | Clog P > 4                 |
| ClogD <sub>7.4</sub>   | Monotonic decreasing               | 1      | ClogD <sub>7.4</sub> ≤ 1.7 | ClogD <sub>7.4</sub> > 2.8 |
| TPSA (Å <sup>2</sup> ) | Hump function                      | 1      | 44.8 < TPSA ≤ 63.3         | TPSA ≤ 32.3; TPSA > 86.2   |
| HBD                    | Monotonic decreasing               | 1      | HBD ≤ 1                    | HBD > 2                    |
| pKa                    | Monotonic decreasing               | 1      | pKa ≤ 7.2                  | pKa > 9.5                  |

MW: molecular weight, TPSA: topological polar surface area, HBD: hydrogen bond donor, pKa: ionization constant of the most basic center.

**Table S2** Simulation details for each system

| System     | Simulation time (ns) | Number of trajectories | Number of atoms |
|------------|----------------------|------------------------|-----------------|
| tau+CNS-4  | 500                  | 4                      | 92057           |
| tau+CNS-12 | 500                  | 4                      | 92057           |
| tau+CNS-18 | 500                  | 4                      | 92071           |

|            |     |   |       |
|------------|-----|---|-------|
| tau+CNS-25 | 500 | 4 | 92062 |
|------------|-----|---|-------|

**Table S3** Prediction of possible binding sites for compounds in CTE tau protofibril <sup>a</sup>

| Predicted binding sites | Schematic representation                                                            | SiteScore | Dscore |
|-------------------------|-------------------------------------------------------------------------------------|-----------|--------|
| Site 1                  | 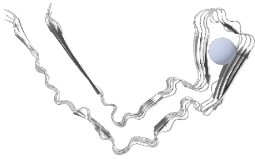   | 1.209     | 1.294  |
| Site 2                  |    | 0.859     | 0.924  |
| Site 3                  |   | 0.809     | 0.817  |
| Site 4                  |  | 0.595     | 0.456  |

<sup>a</sup> Purple sphere represent possible binding sites of compounds to tau protofibrils.

**Table S4** SP docking results of reported CNS PET tracers with CTE tau protofibrils

| Compound Number | Compound         | Docking score (kcal/mol) | Glide g-score (kcal/mol) | Glide e-model (kcal/mol) |
|-----------------|------------------|--------------------------|--------------------------|--------------------------|
| 1               | 18F-PM-PBB3      | -8.23                    | -8.26                    | -69.24                   |
| 2               | 18F-CBD-2115     | -8.05                    | -8.05                    | -63.98                   |
| 3               | 18F-PI-2620      | -7.09                    | -7.27                    | -49.73                   |
| 4               | 18F-RO-948       | -7.29                    | -7.47                    | -52.98                   |
| 5               | 18F-MK-6240      | -7.48                    | -7.66                    | -50.11                   |
| 6               | 18F-Flortaucipir | -7.61                    | -7.65                    | -53.66                   |

**Table S5** The source, molecular formula, and SMILES details of candidate compounds

| Compound Number | CNS BBB Library ID Number | Molecular Formula                                                            | SMILE                                                        |
|-----------------|---------------------------|------------------------------------------------------------------------------|--------------------------------------------------------------|
| 1               | T408-0727                 | C <sub>24</sub> H <sub>30</sub> N <sub>4</sub> O <sub>2</sub> S              | O=C(C(CC1)Cc2c1sc(C(N1CCCC1)=O)c2)N(CC1)CCN1c1cccc1          |
| 2               | IB03-8110                 | C <sub>27</sub> H <sub>30</sub> N <sub>4</sub> OS                            | N=C1N(CCC2CCN(Cc3cccc3)CC2)CC(O)=C1c1nc(-c2cccc2)cs1         |
| 3               | T160-0467                 | C <sub>25</sub> H <sub>28</sub> FN <sub>3</sub> O <sub>2</sub>               | Cc1enc(CC(CC2)CCN2C(c(cc2)cc(F)c2OC)=O)n1Cc1cccc1            |
| 4               | V017-7820                 | C <sub>24</sub> H <sub>26</sub> F <sub>3</sub> N <sub>3</sub> O <sub>3</sub> | O=C(c(ccc(F)c1)c1F)N1CC(CN(CCC2)CCN2C(c(cc2)ccc2F)=O)OCC1    |
| 5               | P801-0566                 | C <sub>26</sub> H <sub>29</sub> N <sub>5</sub> O                             | O=C(c(cc1)enc1N1CC(c2cccc2)NCC1)N(CC1)CCN1c1cccc1            |
| 6               | T160-0582                 | C <sub>25</sub> H <sub>28</sub> FN <sub>3</sub> O                            | Cc1enc(CC(CC2)CCN2C(c2cc(C)ccc2)=O)n1Cc(cc1)ccc1F            |
| 7               | D454-0334                 | C <sub>23</sub> H <sub>25</sub> ClN <sub>4</sub> O                           | O=C(C1CCCC1)Nc(ccc(N1Cc2nc(ccc3)c3n2CC1)c1)c1Cl              |
| 8               | P801-0571                 | C <sub>26</sub> H <sub>28</sub> FN <sub>5</sub> O                            | O=C(c(cc1)enc1N1CC(c2cccc2)NCC1)N(CC1)CCN1c(cc1)ccc1F        |
| 9               | S993-0623                 | C <sub>22</sub> H <sub>26</sub> N <sub>4</sub> O <sub>3</sub>                | CC(C)CN(CC(N(CC1)C2CCN1C(c1nc3cccc3cc1)=O)=O)C2=O            |
| 10              | V021-8191                 | C <sub>26</sub> H <sub>33</sub> FN <sub>4</sub> O <sub>4</sub> S             | COc(ccc(C(N1CCN(CC(C2)OCCN2C(Nc(cc2)ccc2F)=S)CCC1)=O)c1)c1OC |
| 11              | 7894-6124                 | C <sub>28</sub> H <sub>28</sub> F <sub>3</sub> N <sub>3</sub> O              | O=C(c1ccc(CN(CC2)Cc3c2cccc3)cc1)N(CC1)CCN1c1cccc(C(F)(F)F)c1 |
| 12              | S776-0061                 | C <sub>24</sub> H <sub>30</sub> N <sub>4</sub> O                             | Cc1enc(C2CC2)n1CCC(CC1)CCN1C(Cc1c[nH]c2c1cccc2)=O            |
| 13              | V001-3797                 | C <sub>25</sub> H <sub>25</sub> F <sub>3</sub> N <sub>4</sub> O              | O=C(c1en(CC(CC2)c3cccc3)c2n1)N(CC1)CCN1c1cccc(C(F)(F)F)c1    |
| 14              | C598-0388                 | C <sub>24</sub> H <sub>23</sub> ClFN <sub>3</sub> O                          | O=C(c1ccc2c(Cl)c(CCCC3)c3nc2c1)N(CC1)CCN1c(ccc1)c1F          |
| 15              | V021-4414                 | C <sub>21</sub> H <sub>23</sub> ClF <sub>3</sub> N <sub>3</sub> O            | CC(C(NCc1cc(C(F)(F)F)ccc1)=O)N(CC1)CCN1c(cc1)ccc1Cl          |
| 16              | C598-0434                 | C <sub>24</sub> H <sub>23</sub> ClFN <sub>3</sub> O                          | O=C(c1ccc2c(Cl)c(CCCC3)c3nc2c1)N(CC1)CCN1c(cc1)ccc1F         |
| 17              | L275-0441                 | C <sub>25</sub> H <sub>31</sub> N <sub>5</sub> O <sub>2</sub>                | Cc(cc1)c(C)cc1C(N1CCN(Cc2nc(cc3)C(N(C)C)=O)c3n2C)CC1)=O      |
| 18              | S567-0465                 | C <sub>26</sub> H <sub>33</sub> N <sub>3</sub> O <sub>2</sub>                | Cc(cc1)nc1C(N1CCC(CC2)(CCC2(CN(CC2)c3c2cccc3)O)CC1)=O        |
| 19              | T160-0459                 | C <sub>25</sub> H <sub>29</sub> N <sub>3</sub> O                             | Cc1enc(CC(CC2)CCN2C(c2cc(C)ccc2)=O)n1Cc1cccc1                |
| 20              | D672-0115                 | C <sub>27</sub> H <sub>28</sub> FN <sub>3</sub> O                            | O=C(c1ccc(CN(CC2)Cc3c2cccc3)cc1)N(CC1)CCN1c(cc1)ccc1F        |
| 21              | G856-8799                 | C <sub>22</sub> H <sub>20</sub> F <sub>3</sub> N <sub>5</sub> O              | O=C(c1ccc(C(F)(F)F)cc1)N(CC1)CCN1c(cc1)nc1Nc1cccc1           |
| 22              | S691-0847                 | C <sub>24</sub> H <sub>26</sub> FN <sub>3</sub> O                            | Cc1enc(CC(CC2)CN2C(Cc2cccc(F)c2)=O)n1Cc1cccc1                |
| 23              | S691-0905                 | C <sub>27</sub> H <sub>31</sub> N <sub>3</sub> O <sub>2</sub>                | Cc1enc(CC(CC2)CN2C(C2(CC2)c(cc2)ccc2OC)=O)n1Cc1cccc1         |
| 24              | C304-0340                 | C <sub>28</sub> H <sub>29</sub> N <sub>3</sub> OS                            | CCC1=Nc(cc(cc2)C(N(CC3)CC(C)N3c3cc(C)ccc3)=O)c2Sc2c1cccc2    |
| 25              | T828-0465                 | C <sub>21</sub> H <sub>25</sub> FN <sub>4</sub> O                            | O=C(C(CC1)Cc2c1nc(N1CCCC1)nc2)NCc(cc1)ccc1F                  |

**Table S6** Prediction biological properties of candidate compounds <sup>b</sup>

| Compound Number | MW (g/mol) | ClogP | ClogD7.4 | TPSA (Å <sup>2</sup> ) | HBD | pKa  | CNS PET MPO | P-gp substrate |
|-----------------|------------|-------|----------|------------------------|-----|------|-------------|----------------|
| 1               | 438.59     | 3.60  | 3.56     | 84.99                  | 0   | 6.42 | 2.39        | Yes            |

---

|    |        |      |      |       |   |      |      |     |
|----|--------|------|------|-------|---|------|------|-----|
| 2  | 458.62 | 2.96 | 1.08 | 91.69 | 2 | 15.0 | 1.87 | no  |
| 3  | 421.52 | 3.87 | 3.63 | 47.36 | 0 | 7.33 | 3.05 | yes |
| 4  | 461.49 | 2.55 | 2.18 | 53.09 | 0 | 7.53 | 4.46 | no  |
| 5  | 427.55 | 3.74 | 2.89 | 51.71 | 1 | 8.18 | 2.8  | no  |
| 6  | 405.52 | 4.54 | 4.30 | 38.13 | 0 | 7.33 | 2.41 | yes |
| 7  | 408.93 | 5.17 | 5.17 | 50.16 | 1 | 4.60 | 3.00 | yes |
| 8  | 445.54 | 3.89 | 3.04 | 51.71 | 1 | 8.18 | 2.67 | no  |
| 9  | 394.48 | 1.22 | 1.22 | 73.82 | 0 | 1.98 | 4.45 | yes |
| 10 | 516.63 | 2.89 | 2.52 | 66.51 | 1 | 7.54 | 3.95 | yes |
| 11 | 479.55 | 5.59 | 4.84 | 26.79 | 0 | 8.07 | 1.62 | yes |
| 12 | 390.53 | 3.19 | 2.98 | 53.92 | 1 | 7.27 | 3.64 | no  |
| 13 | 454.50 | 4.67 | 4.67 | 41.37 | 0 | 3.74 | 2.73 | yes |
| 14 | 423.92 | 5.24 | 5.24 | 36.44 | 0 | 3.34 | 2.33 | no  |
| 15 | 425.88 | 4.60 | 4.38 | 35.58 | 1 | 7.23 | 2.25 | no  |
| 16 | 423.92 | 5.24 | 5.24 | 36.44 | 0 | 3.37 | 2.33 | no  |
| 17 | 433.56 | 2.75 | 2.74 | 61.68 | 0 | 5.66 | 4.13 | yes |
| 18 | 419.57 | 2.98 | 2.98 | 56.67 | 1 | 5.19 | 3.85 | no  |
| 19 | 387.53 | 4.40 | 4.16 | 38.13 | 0 | 7.33 | 2.41 | yes |
| 20 | 429.54 | 4.86 | 4.10 | 26.79 | 0 | 8.07 | 1.62 | yes |
| 21 | 427.43 | 4.32 | 4.32 | 61.36 | 1 | 8.81 | 2.30 | yes |
| 22 | 391.49 | 3.64 | 3.58 | 38.13 | 0 | 6.60 | 2.77 | yes |
| 23 | 429.56 | 3.97 | 3.91 | 47.36 | 0 | 6.60 | 3.03 | yes |
| 24 | 455.62 | 6.57 | 6.57 | 35.91 | 0 | 4.49 | 2.29 | no  |
| 25 | 368.46 | 3.52 | 3.52 | 58.12 | 1 | 2.77 | 3.40 | no  |

---

<sup>b</sup> MW: molecular weight, TPSA: topological polar surface area, HBD: hydrogen bond donor, p*K*<sub>a</sub>: ionization constant of the most basic center. ChemAxon (Marvin Sketch version 21.16) was used to estimate six fundamental physicochemical properties of the candidate compounds, including ClogP, ClogD7.4, and p*K*<sub>a</sub>.

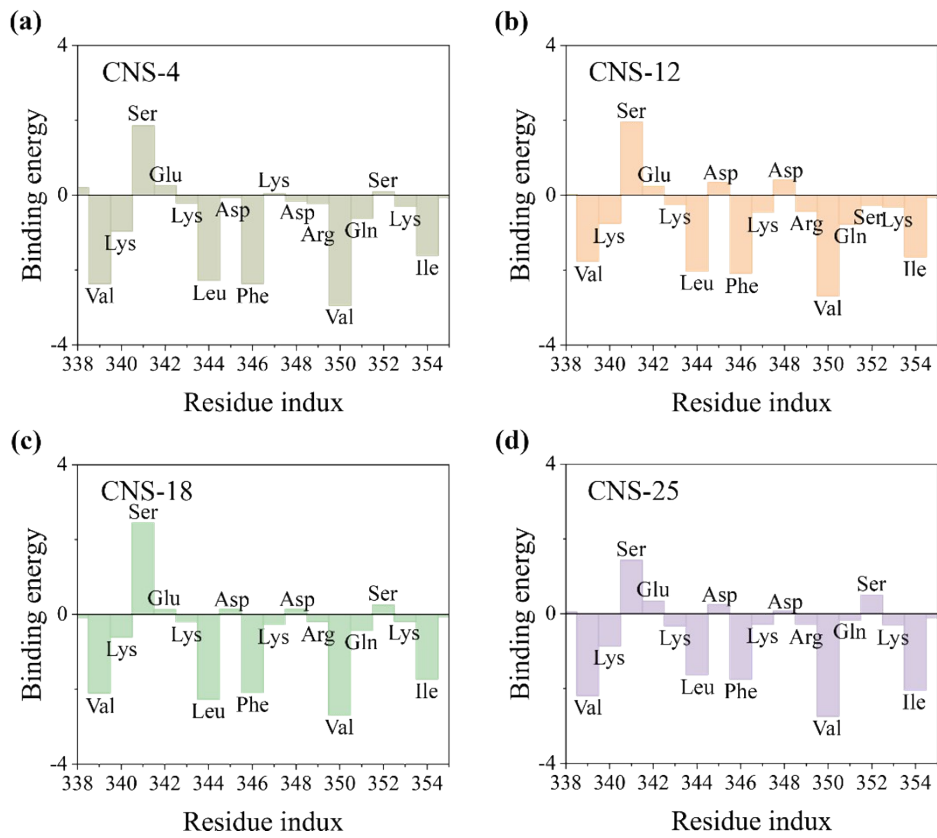

**Fig. S1** The binding energy (kcal/mol) contribution of CNS-4 (a), CNS-12 (b), CNS-18 (c) or CNS-25 (d) to each residue in Site 1 of tau protofibril.
